# Supplementary material for: Senescence-Related Changes in Gene Expression of Peripheral Blood Mononuclear Cells from Octo/Nonagenarians Compared to Their Offspring
Source: Oxid Med Cell Longev. 2013 Nov 27;2013:189129. doi: 10.1155/2013/189129 (PMC3863454; doi:10.1155/2013/189129)
Supplement: Supplementary file 1 — Table S1: Body mass index (BMI) values, age and gender of octo/nonagenarian and offspring groups. The P-value refers to a two-tailed t-test for the differences in means between the BMI values in octo/nonagenarians vs. offspring. A total of four male and 14 female subjects were recruited in this study. Table S2: A complete list of 812 genes which were differentially expressed with significant levels of P<0.05, Benjamini-Hochberg false discovery rate (FDR) adjustment and fold changes ≥1.2. The fold-change refers to the ratio of the expression values of octo/nonagenarians over offspring. Table S3: A complete list of 1312 genes which were differentially expressed with significant levels of P<0.05, Benjamini-Hochberg false discovery rate (FDR) adjustment and fold changes >1.0. The fold-change refers to the ratio of the expression values of octo/nonagenarians over offspring. [file 189129.f1.xlsx]

## Sheet: Sheet1
Octo/nonagenarian	Age	Gender	BMI		offspring	Age	Gender	BMI
1	91	M	20.0288		16	48	F	23.266
2	83	F	19.8128		18	56	M	24.3824
4	82	F	28.0618		20	46	F	26.0375
6	99	F	18.3432		25	47	F	23.52
7	86	F	22.3829		32	55	F	28.1221
9	89	M	28.3771		33	53	F	27.0093
11	83	F	26.189		36	50	M	27.3797
17	80	F	21.9289		38	52	F	25.5588
19	82	F	18.3673		39	45	F	22.8624
average	86.1111		22.6102		average	50.2222		25.3487
SD	6.00925		3.98434		SD	3.99305		1.93295
BMI	Octo/nona	offspring	ttest
	22.6102	25.3487	0.0820951
